# Supplementary material
Source: Royal Society of Chemistry journal article supplement (doi:10.1039/d6cc00208k)
Supplement: d6cc00208k1.pdf [file d6cc00208k1.pdf]

Electronic Supplementary Material (ESI) for Communications.

This journal is © The Royal Society of Chemistry 2018

## Electronic Supplementary Information

### Strong interfacial electronic coupling activates NiFeOOH for alkaline seawater oxidation

Bari Wulan,<sup>‡\*a</sup>, Weipeng Zhang,<sup>‡a</sup> Nana Chen,<sup>a</sup> Yuying Zhao,<sup>a</sup> Haibin Guan,<sup>a</sup> Jing Zhang,<sup>\*b</sup> Dongxing Tan,<sup>c</sup> Lei Chen,<sup>\*a</sup> Baofeng Zhao<sup>\*a</sup>

<sup>a</sup> *Energy Research Institute, Shandong Key Laboratory of Clean and Efficient Biomass Energy Conversion and Utilization, Qilu University of Technology (Shandong Academy of Sciences), Jinan 250014 China. E-mail: bariwulan@qlu.edu.cn, zhaobf@sderi.cn*

<sup>b</sup> *Advanced Materials Institute, Qilu University of Technology (Shandong Academy of Sciences), Jinan 250014 China. E-mail: jingzhang@qlu.edu.cn*

<sup>c</sup> *Shandong Key Laboratory of Catalytic Conversion and Clean Energy, School of Chemistry and Chemical Engineering, Qufu Normal University, Qufu 273165 China.*

<sup>‡</sup> These authors contributed equally to this work.

## Experimental section

### Materials and Chemicals

Nickel mesh (NM, 60 mesh), iron (III) nitrate nonahydrate ( $\text{Fe}(\text{NO}_3)_3 \cdot 9\text{H}_2\text{O}$ ), nickel (II) nitrate hexahydrate ( $\text{Ni}(\text{NO}_3)_2 \cdot 6\text{H}_2\text{O}$ ), gallium nitrate hydrate ( $\text{Ga}(\text{NO}_3)_3 \cdot x\text{H}_2\text{O}$ ), potassium hydroxide (KOH), sodium chloride (NaCl), sodium hypophosphite monohydrate ( $\text{NaH}_2\text{PO}_2 \cdot \text{H}_2\text{O}$ ), Ruthenium (IV) oxide ( $\text{RuO}_2$ ), absolute methanol, hydrochloric acid (HCl) are purchased from Sinopharm Chemical Reagent Co., Ltd. FAA-3-PK-130 anion exchange membrane and commercial Pt/C catalysts were purchased from Suzhou Sinerotechnology Co., Ltd. The ultrapure water ( $18.2 \text{ M}\Omega \cdot \text{cm}$ ) was used in all experiments.

### Preparation of $\text{Ni}_2\text{P}/\text{Fe}_2\text{P}-\text{Ga}$

In a typical synthesis, nickel mesh (NM) was ultrasonically cleaned in absolute ethanol, 3 M HCl, and deionized water for 10 min each, followed by drying under an Ar atmosphere. An aqueous precursor solution (100 mL) containing 0.4 mmol  $\text{Ni}(\text{NO}_3)_2 \cdot 6\text{H}_2\text{O}$ , 0.1 mmol  $\text{Fe}(\text{NO}_3)_3 \cdot 9\text{H}_2\text{O}$ , and x mmol  $\text{Ga}(\text{NO}_3)_3 \cdot x\text{H}_2\text{O}$  (x = 0, 0.01, 0.1, and 0.2) was spray-deposited onto the NM placed on a hot plate maintained at  $300^\circ\text{C}$ . During deposition, compressed air at 0.2 MPa was used as the carrier gas, with the nozzle positioned 16 cm above the substrate, and the precursor solution was intermittently sprayed in cycles of 2 s on / 8 s off for 80 cycles to obtain NiFe-LDH-Ga. The coated substrates were subsequently phosphidized in a tube furnace under an Ar flow of  $15 \text{ mL min}^{-1}$ , with 0.4 g  $\text{NaH}_2\text{PO}_2 \cdot \text{H}_2\text{O}$  placed upstream as the phosphorus source. The furnace was heated to  $350^\circ\text{C}$  at a ramping rate of  $4^\circ\text{C min}^{-1}$ , maintained for 2 h, and naturally cooled to room temperature to obtain  $\text{Ni}_2\text{P}/\text{Fe}_2\text{P}-\text{Ga}$ .

### Preparation of $\text{NiFeOOH}-\text{GaO}_x$

Electrochemical activation was conducted by chronopotentiometry at  $100 \text{ mA cm}^{-2}$  for 1 h in a three-electrode configuration, with  $\text{Ni}_2\text{P}/\text{Fe}_2\text{P}-\text{Ga}$ , a graphite rod, and an Hg/HgO electrode serving as the working, counter, and reference electrodes, respectively. The activated  $\text{Ni}_2\text{P}/\text{Fe}_2\text{P}-\text{Ga}$  underwent in situ electrochemical oxidative reconstruction into the  $\text{NiFeOOH}-\text{GaO}_x$  phase. The average loading mass of the reconstructed  $\text{NiFeOOH}-\text{GaO}_x$  catalyst was estimated to be  $\sim 0.63 \text{ mg cm}^{-2}$  from the mass difference of the nickel mesh before and after preparation.

## Materials characterizations

The morphology and microstructures were systematically investigated by scanning electron microscopy (SEM, ZEISS GeminiSEM 300) and transmission electron microscopy (TEM, JEOL JEM-2100F). The phase composition was identified by X-ray diffraction (XRD, Bruker D8), and the surface chemical states and electronic structure were analyzed by X-ray photoelectron spectroscopy (XPS, Thermo Scientific ESCALAB 250Xi). Raman spectra were collected on a LabRAM Raman spectrometer with 532 nm laser excitation.

## Electrochemical measurements

Electrochemical measurements were performed in a three-electrode configuration using a Donghua 7002A electrochemical workstation. A graphite rod and an Hg/HgO electrode served as the counter and reference electrodes, respectively. All potentials were converted to the reversible hydrogen electrode (RHE) scale. Linear sweep voltammetry (LSV) was recorded at a scan rate of 5 mV s<sup>-1</sup>. Tafel slopes were obtained by fitting the Tafel equation ( $\eta = a + b \log j$ ), where  $b$  is the slope and  $j$  is the current density. Electrochemical impedance spectroscopy (EIS) was conducted over a frequency range from 0.1 Hz to 100 kHz with an AC amplitude of 5 mV. The electrochemically active surface area (ECSA) was estimated from the double-layer capacitance ( $C_{dl}$ ), which was derived from cyclic voltammetry (CV) collected at scan rates of 20, 40, 60, 80, and 100 mV s<sup>-1</sup>. Simulated seawater electrolysis was further evaluated in an anion-exchange membrane (AEM) electrolyzer using Pt/C as the cathode (1 cm<sup>2</sup>), NiFeOOH-Ga<sub>2</sub>O<sub>3</sub> as the anode (1 cm<sup>2</sup>), and an AEM separator (Fumasep FAA-3-PK-130).

## Computational details

All density functional theory (DFT) calculations were performed using the projector-augmented wave (PAW) method as implemented in the Vienna Ab initio Simulation Package (VASP). The exchange-correlation interaction was described by the generalized gradient approximation (GGA) with the Perdew-Burke-Ernzerhof (PBE) functional, and long-range dispersion was included using the DFT-D3 correction. A plane-wave kinetic-energy cutoff of 400 eV was employed, and the electronic self-consistent field iterations were converged to  $1 \times 10^{-5}$  eV. A 15 Å vacuum layer was added to avoid the interaction between periodic cells. All structures were relaxed until

the residual force on each atom was below 0.03 eV/Å.

Under alkaline OER conditions, NiFe-LDH undergoes (de)protonation and oxidation to form Ni(Fe)OOH active phases. An LDH-derived layered NiFe (oxy)hydroxide slab was used as the structural model for the active surface. Considering the amorphous/non-stoichiometric nature of GaO<sub>x</sub> and the absence of a unique atomic configuration, a Ga<sub>2</sub>O<sub>3</sub> cluster was adopted as a simplified yet representative local structural motif of GaO<sub>x</sub> to preserve the essential Ga<sup>3+</sup>-O coordination environment and evaluate its interfacial interaction with the NiFeOOH surface. Accordingly, the Ga<sub>2</sub>O<sub>3</sub> cluster was constructed on the exposed surface of the NiFe (oxy)hydroxide slab to obtain the NiFeOOH-GaO<sub>x</sub> model. The Gibbs free-energy change ( $\Delta G$ ) of each elementary step was evaluated using the computational hydrogen electrode (CHE) model:

$$\Delta G = \Delta E + \Delta ZPE - T\Delta S$$

where  $\Delta E$  is obtained directly from DFT calculations,  $\Delta ZPE$  is the change in zero-point energy,  $T$  is 298.15 K, and  $\Delta S$  is the entropy change between products and reactants. Standard ideal gas methods were employed to calculate ZPE and TS energy correction. For adsorbates, all  $3N$  degrees of freedom were treated as frustrated harmonic vibration with the catalyst surface set to be fixed during the calculation.

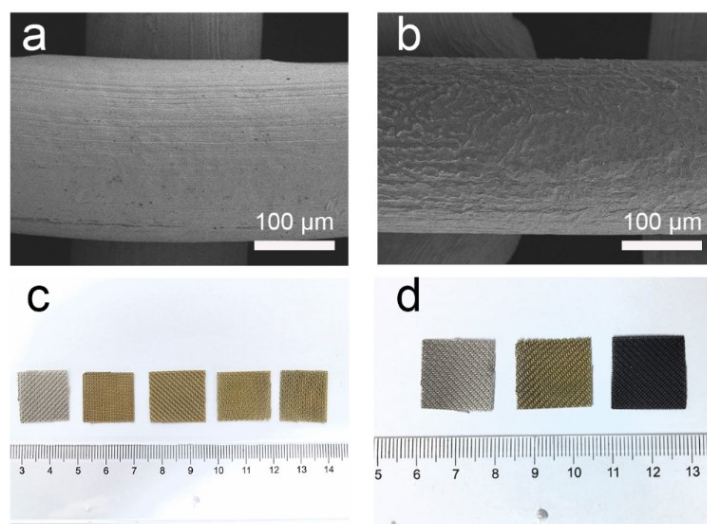

**Fig. S1** SEM images of (a) pristine Ni mesh and (b) NiFe LDH-Ga deposited on Ni mesh by pulsed spray pyrolysis deposition (PSPD). Photographs of (c) NiFe LDH with different Ga contents and (d) the corresponding products after phosphidation.

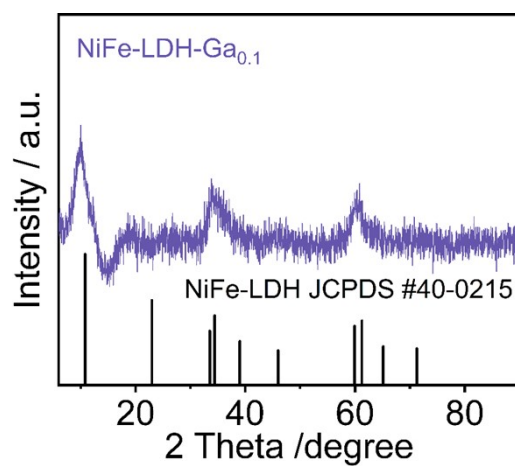

**Fig. S2** XRD pattern of NiFe-LDH-Ga<sub>0.1</sub> deposited on a blank quartz substrate.

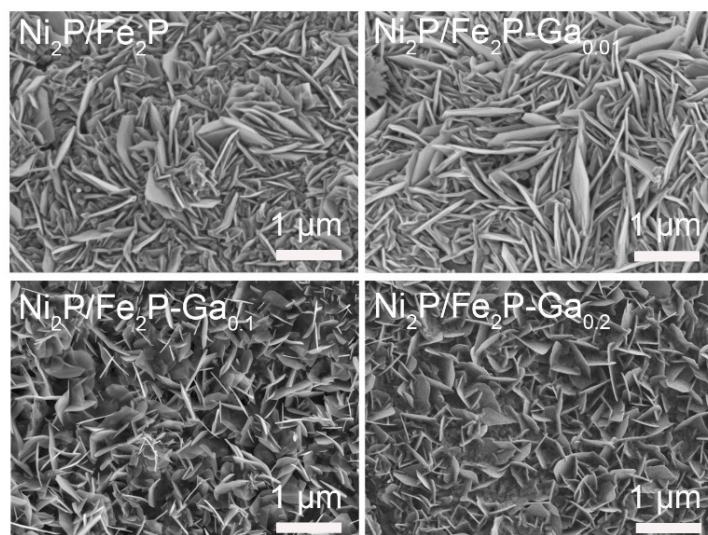

**Fig. S3** SEM images of  $\text{Ni}_2\text{P}/\text{Fe}_2\text{P}-\text{Ga}_x$ : (a)  $x = 0$ , (b)  $x = 0.01$ , (c)  $x = 0.1$ , (d)  $x = 0.2$ .

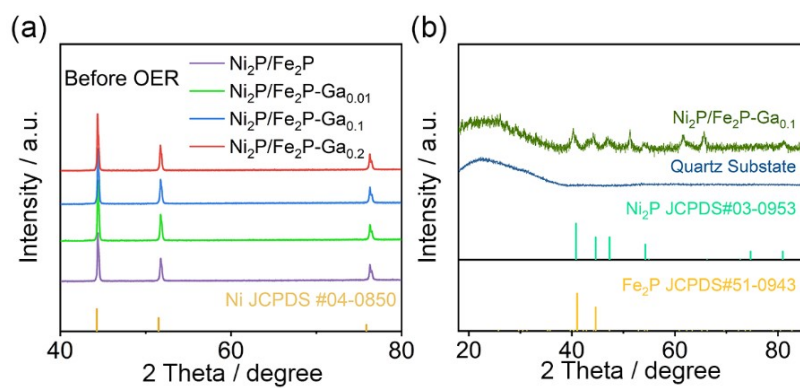

**Fig. S4** XRD patterns of Ni<sub>2</sub>P/Fe<sub>2</sub>P-Ga grown on (a) a nickel mesh and (b) a quartz substrate.

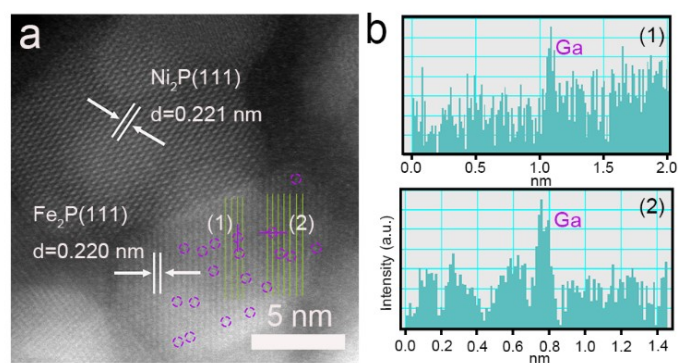

**Fig. S5** (a) HAADF-STEM images and (b) the corresponding intensity line profiles of Ni<sub>2</sub>P/Fe<sub>2</sub>P-Ga<sub>0.1</sub>.

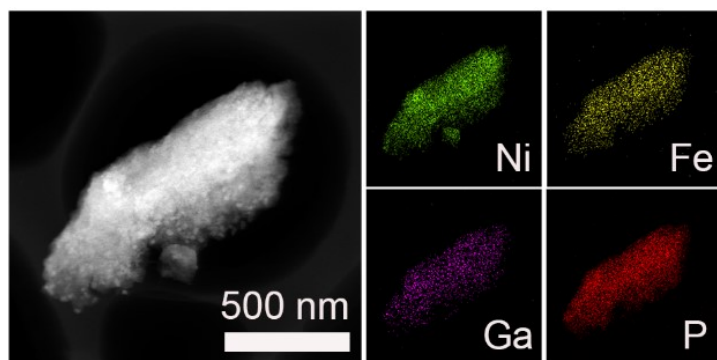

**Fig. S6** The elemental mapping images of  $\text{Ni}_2\text{P}/\text{Fe}_2\text{P}-\text{Ga}_{0.1}$ .

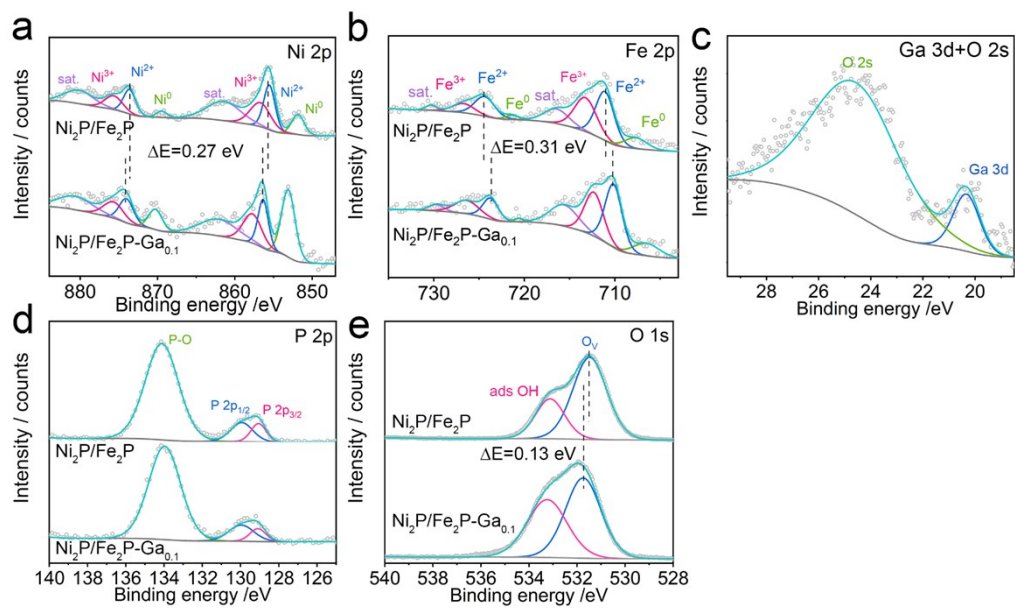

**Fig. S7** High-resolution XPS spectra of  $\text{Ni}_2\text{P}/\text{Fe}_2\text{P}$  and  $\text{Ni}_2\text{P}/\text{Fe}_2\text{P}-\text{Ga}_{0.1}$ : (a) Ni 2p, (b) Fe 2p, (c) Ga 3d + O 2s, (d) P 2p, and (e) O 1s.

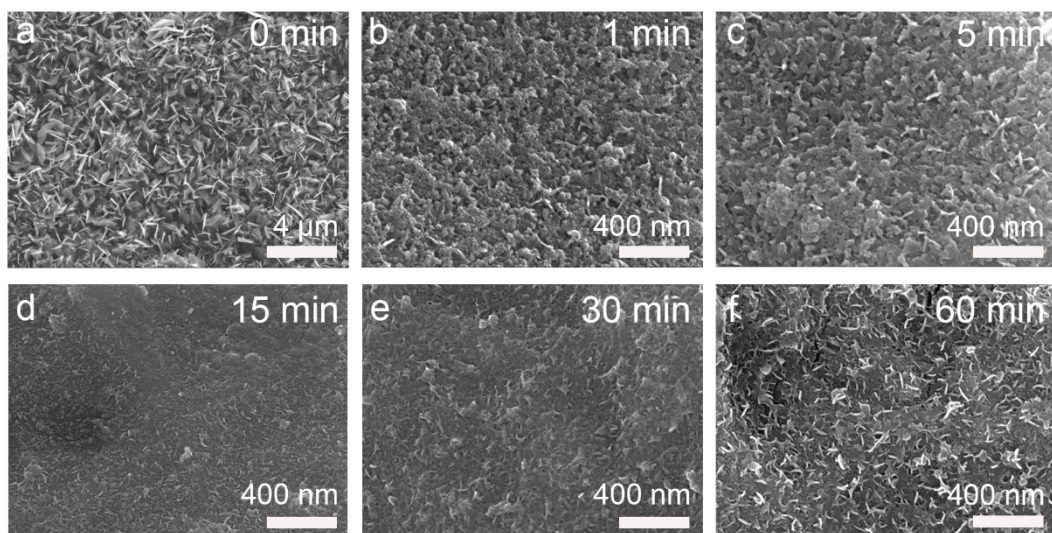

**Fig. S8** SEM images of Ni<sub>2</sub>P/Fe<sub>2</sub>P-Ga<sub>0.1</sub> during OER process at 100 mA cm<sup>-2</sup> for (a) 0 min, (b) 1 min, (c) 5 min, (d) 15 min, (e) 30 min, and (f) 60 min.

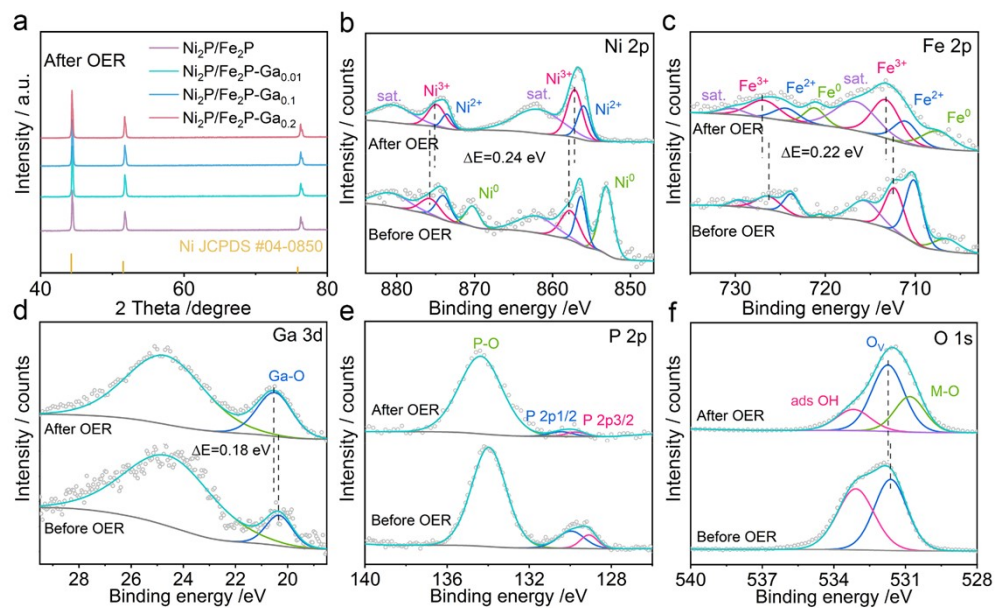

**Fig. S9** (a) X-ray diffraction patterns of post-OER electrodes. XPS spectra of Ni<sub>2</sub>P/Fe<sub>2</sub>P-Ga<sub>0.1</sub> before and after OER: (b) Ni 2p, (c) Fe 2p, (d) Ga 3d + O 2s, (e) P 2p, and (f) O 1s.

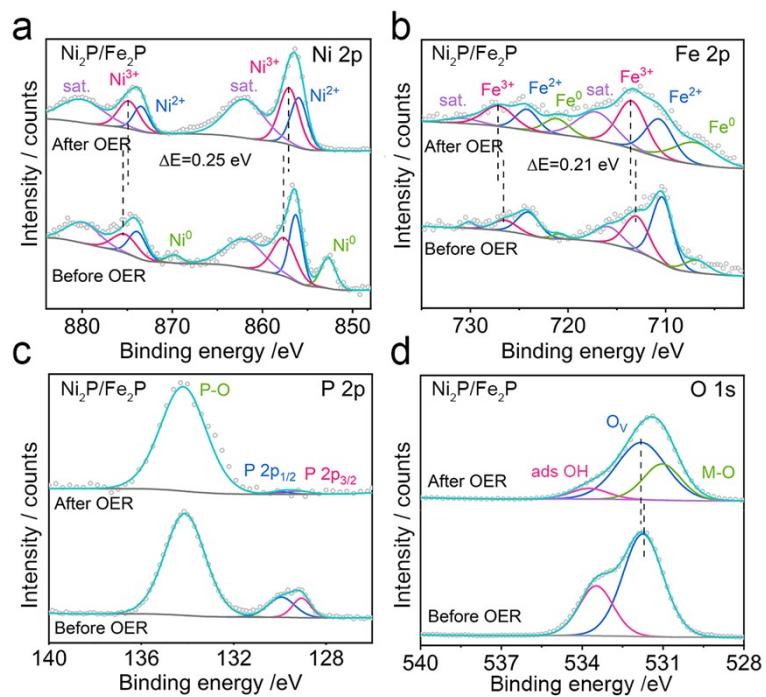

**Fig. S10** XPS spectra of Ni<sub>2</sub>P/Fe<sub>2</sub>P before and after OER: (a) Ni 2p, (b) Fe 2p, (c) P 2p, and (d) O 1s.

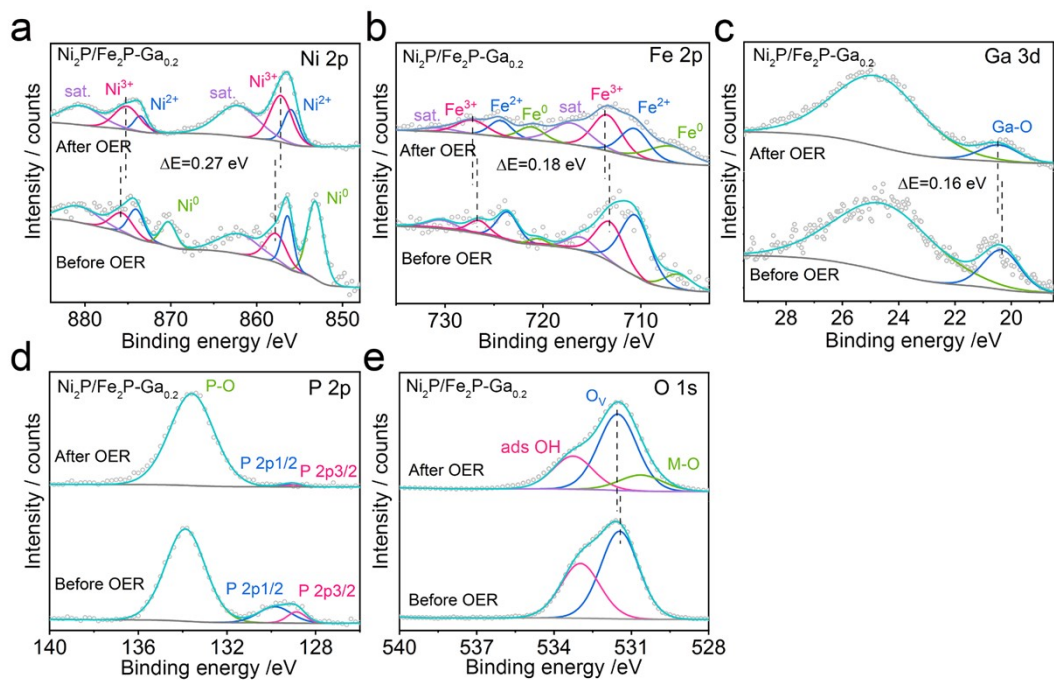

**Fig. S11** XPS spectra of  $\text{Ni}_2\text{P}/\text{Fe}_2\text{P}-\text{Ga}_{0.2}$  before and after OER: (a) Ni 2p, (b) Fe 2p, (c) Ga 3d + O 2s, (d) P 2p, and (e) O 1s.

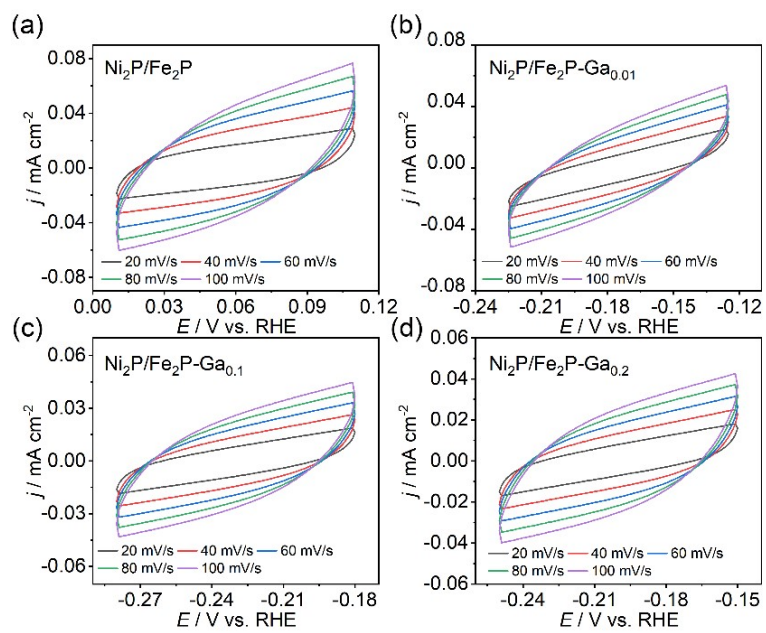

**Fig. S12** CV curves for (a)  $\text{Ni}_2\text{P}/\text{Fe}_2\text{P}$ , (b)  $\text{Ni}_2\text{P}/\text{Fe}_2\text{P-Ga}_{0.01}$ , (c)  $\text{Ni}_2\text{P}/\text{Fe}_2\text{P-Ga}_{0.1}$ , and (d)  $\text{Ni}_2\text{P}/\text{Fe}_2\text{P-Ga}_{0.2}$ .

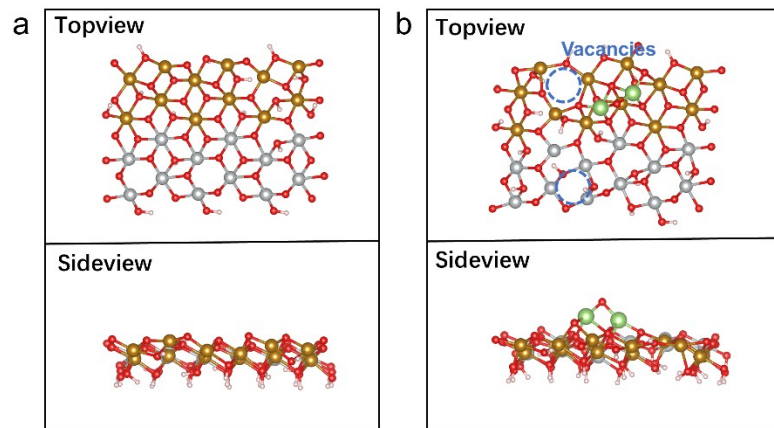

**Fig. S13** The optimized structure of (a) NiFeOOH and (b) NiFeOOH-Ga<sub>2</sub>O<sub>3</sub>.

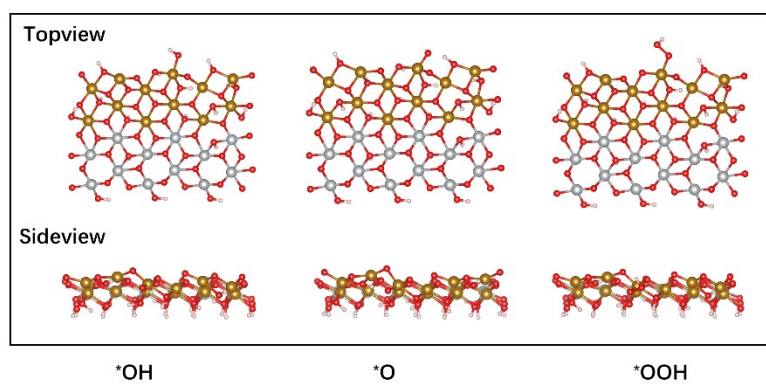

**Fig. S14** The optimized OER configuration of reaction intermediates on NiFeOOH.

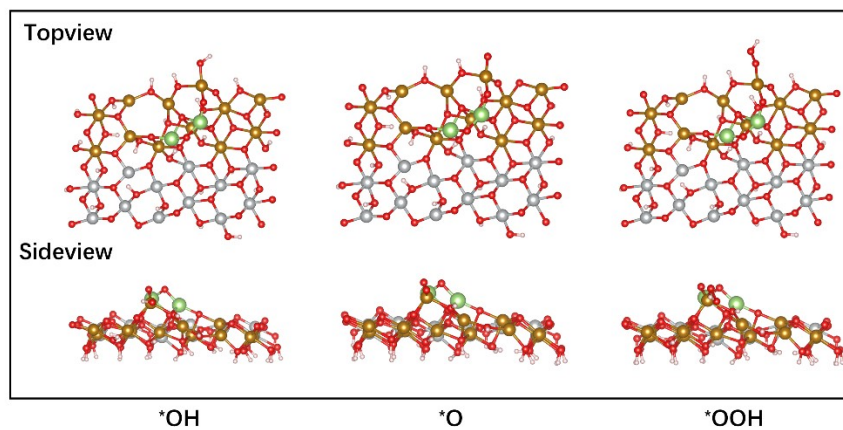

**Fig. S15** The optimized OER configuration of reaction intermediates on NiFeOOH-Ga<sub>2</sub>O<sub>3</sub>.

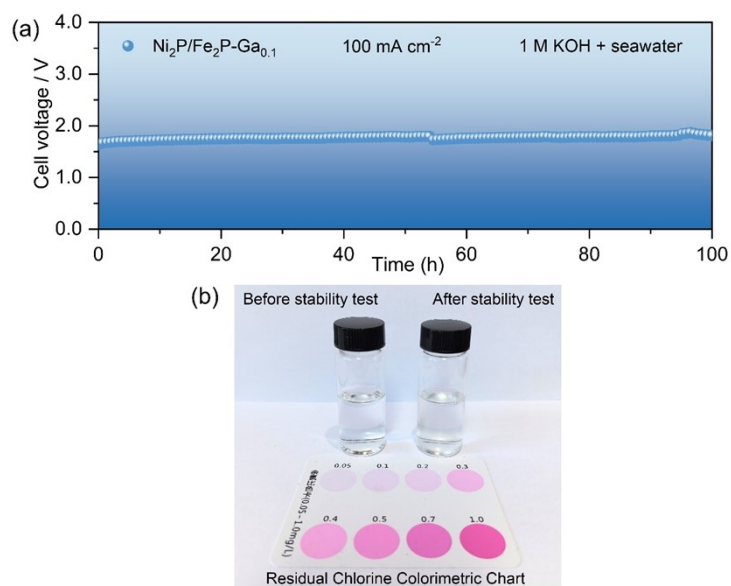

**Fig. S16** (a) Chronopotentiometric test of an AEMWE cell assembled with Pt/C ||  $\text{Ni}_2\text{P}/\text{Fe}_2\text{P}-\text{Ga}_{0.1}$  at  $100 \text{ mA cm}^{-2}$  in  $1 \text{ M KOH} + \text{seawater}$  electrolyte. (b) Colorimetric test results for hypochlorite after 100 h stability test of the  $\text{Ni}_2\text{P}/\text{Fe}_2\text{P}-\text{Ga}_{0.1}$  electrode at  $100 \text{ mA cm}^{-2}$ .

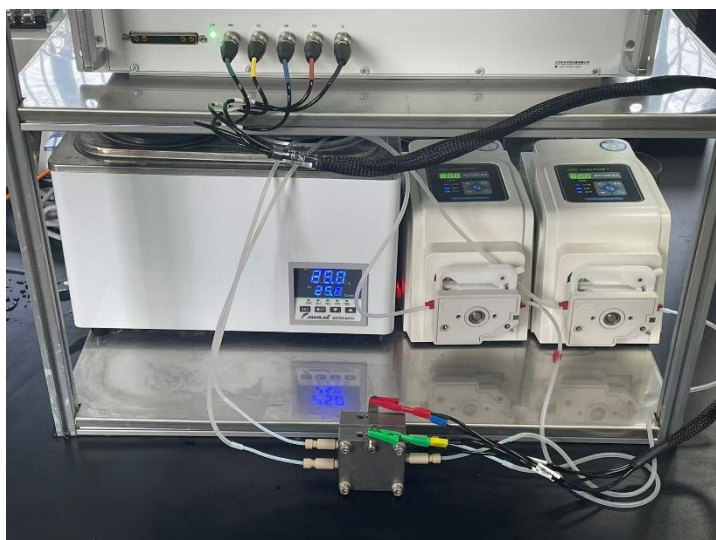

**Fig. S17** The schematic diagram of the AEMWE system using Pt/C|| Ni<sub>2</sub>P/Fe<sub>2</sub>P-Ga<sub>0.1</sub>.

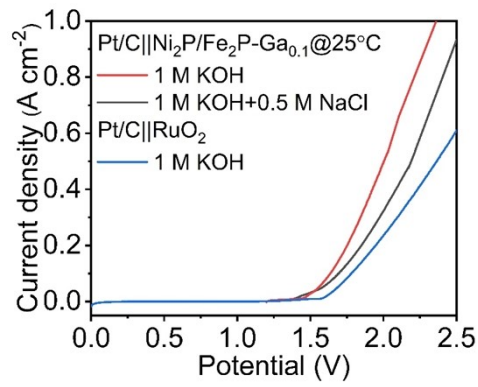

**Fig. S18** The polarization curve of AEM electrolyzer using Pt/C || Ni<sub>2</sub>P/Fe<sub>2</sub>P-Ga<sub>0.1</sub> and Pt/C || RuO<sub>2</sub> at 25°C, respectively.

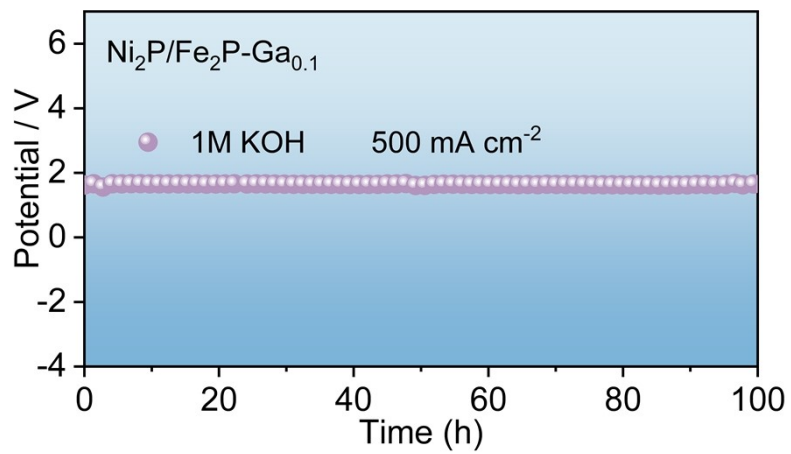

**Fig. S19** Chronopotentiometric testing of the AEMWE using Pt/C || Ni<sub>2</sub>P/Fe<sub>2</sub>P-Ga<sub>0.1</sub> at 500 mA cm<sup>-2</sup>.

**Table S1** Overpotential comparison of recently reported OER electrocatalysts.

| Catalyst                                                                                | Loading (mg cm <sup>-2</sup> ) | Overpotential (mV, j=100 mA cm <sup>-2</sup> ) | Electrolyte        | Refs.                                                       |
|-----------------------------------------------------------------------------------------|--------------------------------|------------------------------------------------|--------------------|-------------------------------------------------------------|
| Ni <sub>2</sub> P/Fe <sub>2</sub> P-Ga <sub>0.1</sub>                                   | 0.63                           | 227                                            | 1 M KOH            | <b>This work</b>                                            |
|                                                                                         |                                | 249                                            | 1M KOH+0.5 M NaCl  |                                                             |
| NiCe <sub>0.05</sub> /Fe@NM                                                             | 6.2                            | 257                                            | 1 M KOH            | <i>Small</i> 2024, 2403971                                  |
| CoNi-LDH/FeSe                                                                           | ~2.0                           | 272                                            | 1 M KOH            | <i>Chem. Eng. J.</i> 2024, 498, 155834.                     |
|                                                                                         |                                | 272                                            | 1 M KOH+0.5 M NaCl |                                                             |
| Ni <sub>3</sub> FeN@PO <sub>4</sub> <sup>3-</sup> /NF                                   | ~1.8                           | 258                                            | 1 M KOH            | <i>Adv. Mater.</i> 2024, 2415421                            |
| CV-B-NiFe-LDH                                                                           | N/A                            | 219                                            | 1 M KOH            | <i>J. Colloid Interface Sci.</i> 2024, 668, 607.            |
|                                                                                         |                                | 236                                            | 1 M KOH+0.5 M NaCl |                                                             |
| NiFeCo(OH)                                                                              | N/A                            | 255.3                                          | 1 M KOH+1.0 M NaCl | <i>ACS Catal.</i> 2024, 14, 18322                           |
| FeMoOOH/NF                                                                              | ~5.0                           | 240                                            | 1 M KOH            | <i>Energy Environ. Sci.</i> 2025, 18, 1952                  |
| EA-Ni <sub>0.82</sub> Fe <sub>0.18</sub> -OH                                            | N/A                            | 250                                            | 1 M KOH+0.5 M NaCl | <i>J. Energy Chem.</i> 2024, 90, 486.                       |
| NiFe LDH-PANI                                                                           | N/A                            | 270                                            | 1 M KOH            | <i>Appl. Catal. B: Environ. Energy</i> , 2021, 297, 120453. |
| Fe <sub>2.5</sub> Co <sub>2.5</sub> Ni <sub>10</sub> O <sub>y</sub> H <sub>z</sub> @NFF | N/A                            | 229                                            | 1 M KOH            | <i>Carbon Energy</i> 2025, e684.                            |
| NiFe@NVG/CC                                                                             | N/A                            | 300                                            | 1 M KOH            | <i>Nano Res.</i> 2024, 17, 4790                             |
| NiFeGa-LDH@NF                                                                           | ~1.25                          | 258                                            | 1 M KOH            | <i>J. Mater. Chem. A</i> 2025, 13, 16241                    |
| Ni <sub>2</sub> P-NiFe <sub>2</sub> O <sub>4</sub>                                      | 0.25                           | 305                                            | 1 M KOH            | <i>Appl. Catal. B: Environ. Energy</i> 2023,339, 123141     |

**Table S2** Comparison of AEMWE performance of Ni<sub>2</sub>P/Fe<sub>2</sub>P-Ga<sub>0.1</sub> with reported catalysts.

| Catalyst                                                            | Loading (mg cm <sup>-2</sup> ) | Conditions               | Performance                   | Stability                                                    | Refs.                                        |
|---------------------------------------------------------------------|--------------------------------|--------------------------|-------------------------------|--------------------------------------------------------------|----------------------------------------------|
| Pt/C   Ni <sub>2</sub> P/Fe <sub>2</sub> P-Ga <sub>0.1</sub>        | 0.5    0.63                    | 85°C, 30 wt.% KOH        | 1.78V@500mA cm <sup>-2</sup>  | 100 h@500mA cm <sup>-2</sup><br>1 M KOH + 0.5 M NaCl at 25°C | <b>This work</b>                             |
| FeRu@NM-2    FeRu@NM-2                                              | 0.75    0.75                   | 60°C, 1 M KOH            | 1.89V@400mA cm <sup>-2</sup>  | 300 h @500mA cm <sup>-2</sup><br>1 M KOH at 60°C             | <i>Chem. Eng. J.</i> 2024, 493, 152547.      |
| NiCe <sub>0.05</sub> /Fe@NM    NiCe <sub>0.05</sub> /Fe@NM          | 6.2    6.2                     | 60°C, 5 M KOH            | 1.825V@300mA cm <sup>-2</sup> | 100 h@500mA cm <sup>-2</sup><br>5 M KOH at 60°C              | <i>Small</i> 2024, 2403971                   |
| Ni <sub>3</sub> FeN@PO <sub>4</sub> <sup>3-</sup> /NF  Pt-Ni@MoN/NF | 1.8    N/A                     | 25°C, 1 M KOH + seawater | 1.95V@500mA cm <sup>-2</sup>  | 200 h@500mA cm <sup>-2</sup><br>1 M KOH + seawater at 25°C   | <i>Adv. Mater.</i> 2024, 2415421             |
| Co <sub>2.8</sub> W <sub>3.8</sub> -NiFe LDH  Pt/C                  | N/A                            | 60°C, 1 M KOH            | 1.86V@1000mA cm <sup>-2</sup> | 300 h@1000mA cm <sup>-2</sup><br>(1 M KOH at 60°C)           | <i>Adv. Energy Mater.</i> 2024, 14, 2402046. |
| CuNi@NiSe    CuNi@NiSe                                              | N/A                            | 80°C, 1 M KOH            | 2.0V@500 mA cm <sup>-2</sup>  | 10 h@100mA cm <sup>-2</sup><br>(1 M KOH at 80°C)             | <i>Small</i> 2023, 19, 2301613.              |
